# Supplementary material for: Unveiling the Role of Capping Groups in Naphthalene N-Capped Dehydrodipeptide Hydrogels
Source: MDPI journal article supplement (doi:10.3390/gels9060464), 2023-06-06
Supplement: s1 [file s1]

## Article

# Unveiling the Role of Capping Groups in Naphthalene N-Capped Dehydrodipeptide Hydrogels

Helena Vilaça <sup>1,2</sup>, André Carvalho <sup>1</sup>, Tarsila Castro <sup>3</sup>, Elisabete M. S. Castanheira <sup>4</sup>, Loïc Hilliou <sup>5</sup>, Ian Hamley <sup>6</sup>, Manuel Melle-Franco <sup>7</sup>, Paula M. T. Ferreira <sup>1,\*</sup> and José A. Martins <sup>1,\*</sup>

<sup>1</sup> Centre of Chemistry, University of Minho, Campus de Gualtar, 4710-057 Braga, Portugal; hvilaca@citeve.pt (H.V.); andrefcarvalho95@gmail.com (A.C.)

<sup>2</sup> Department of Chemistry and Biotechnology, Technological Centre for the Textile and Clothing Industries of Portugal, 4760-034 Vila Nova de Famalicão, Portugal

<sup>3</sup> Centre of Biological Engineering, University of Minho, Campus de Gualtar, 4710-057 Braga, Portugal; castro.tarsila@ceb.uminho.pt

<sup>4</sup> Physics Centre of Minho and Porto Universities (CF-UM-UP), University of Minho, Campus de Gualtar, 4710-057 Braga, Portugal; ecoutinho@fisica.uminho.pt

<sup>5</sup> Institute for Polymers and Composites, Department of Polymer Engineering, University of Minho, Campus de Azurém, 4800-058 Guimarães, Portugal; loic@dep.uminho.pt

<sup>6</sup> Department of Chemistry, University of Reading, Whiteknights, P.O. Box 224, Reading RG6 6AD, UK; i.w.hamley@reading.ac.uk

<sup>7</sup> CICECO-Aveiro Institute of Materials, Department of Chemistry, University of Aveiro, 3810-193 Aveiro, Portugal; manuelmelle.research@gmail.com

\* Correspondence: pmf@quimica.uminho.pt (P.M.T.F.); jmartins@quimica.uminho.pt (J.A.M.)

## Supplementary Materials

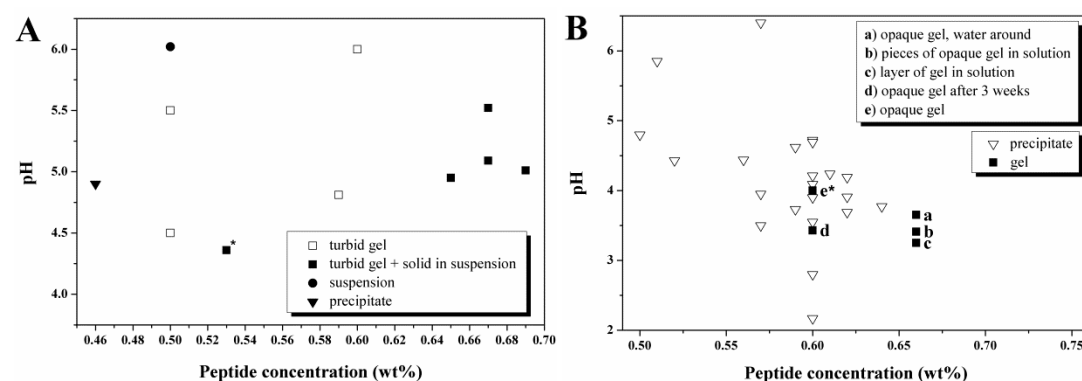

**Figure S1.** Phase diagrams for hydrogelators obtained by addition of GDL to peptide solutions adjusted to pH circa 10 with NaOH 1M: A) 1b; B) 1c. \*approximate pH of the gel (measured with indicator paper).

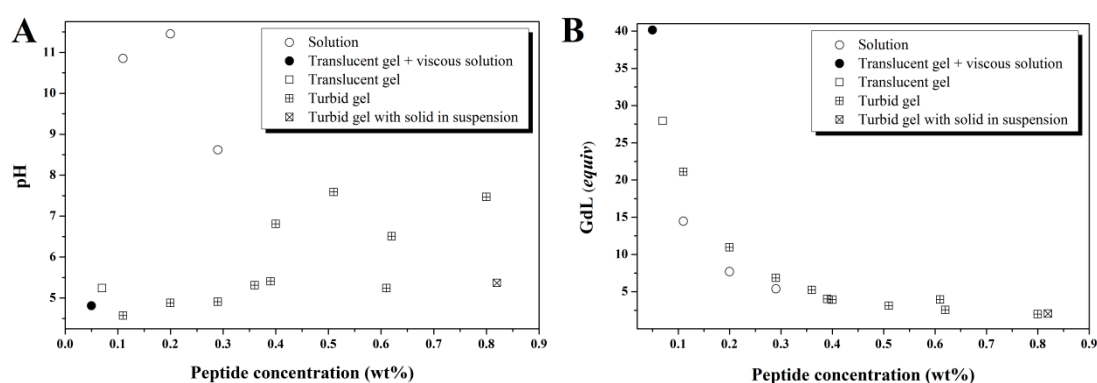

**Figure S2.** Phase diagrams for dehydridepeptide **2a**, obtained by addition of GdL to alkaline solutions of this peptide (4 % (v/v) of NaOH 1 M); A) Correlation between pH and peptide concentration; B) Correlation between equivalents of GdL and peptide concentration.

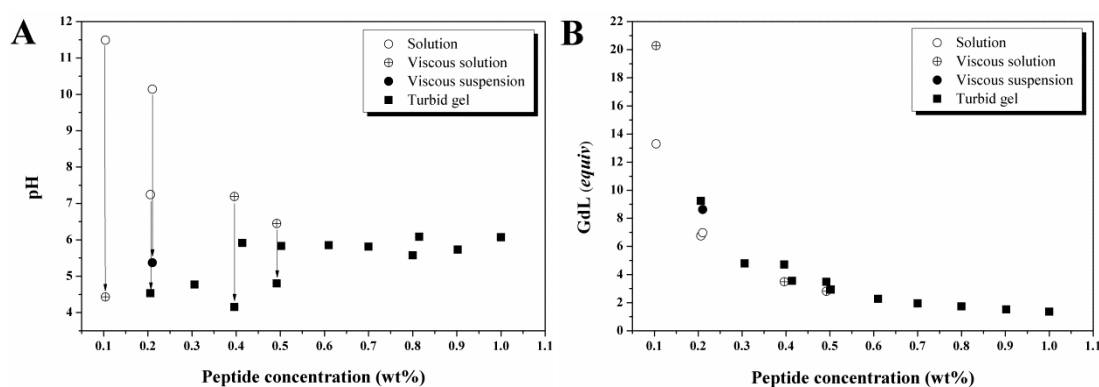

**Figure S3.** Phase diagrams for dehydridepeptide **2b**, obtained by addition of GdL to alkaline solutions of this peptide (4 % (v/v) of NaOH 1 M); A) Correlation between pH and peptide concentration (arrows represent the drop in pH by addition of more GdL to the same solution); B) Correlation between equivalents of GdL and peptide concentration.

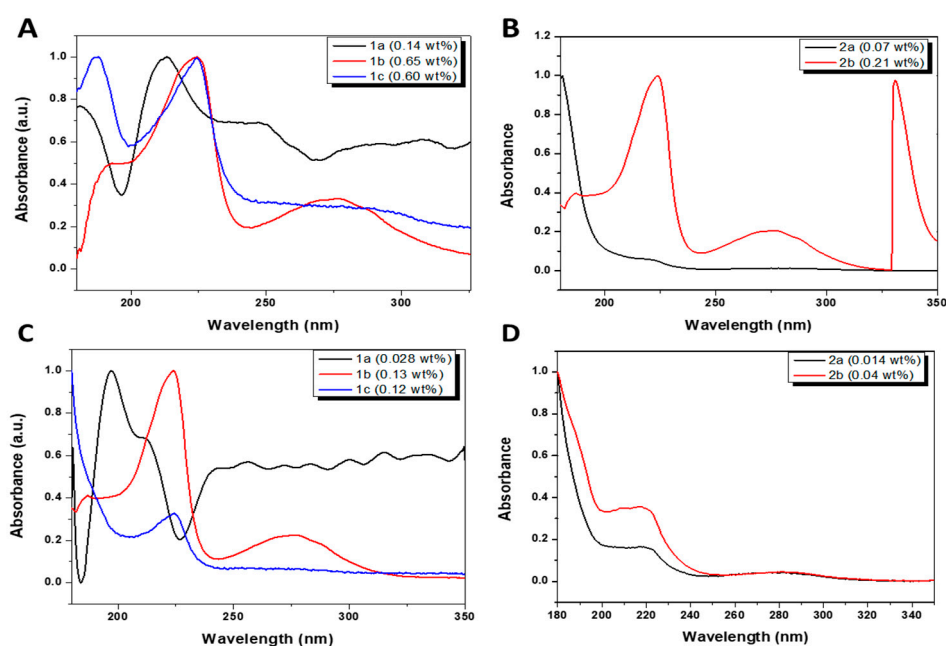

**Figure S4.** UV-VIS absorption spectra for hydrogelators **1a-c** and **2a,b** in gel phase at the same concentration and pH as that deployed for the CD measurements: A) gels **1a-c**; B) gels **2a,b**. UV-VIS absorption spectra for hydrogelators **1a-c** and **2a,b** in solution, at concentrations well below the CGC: c) gels **1a-c**; D) gels **2a,b**.

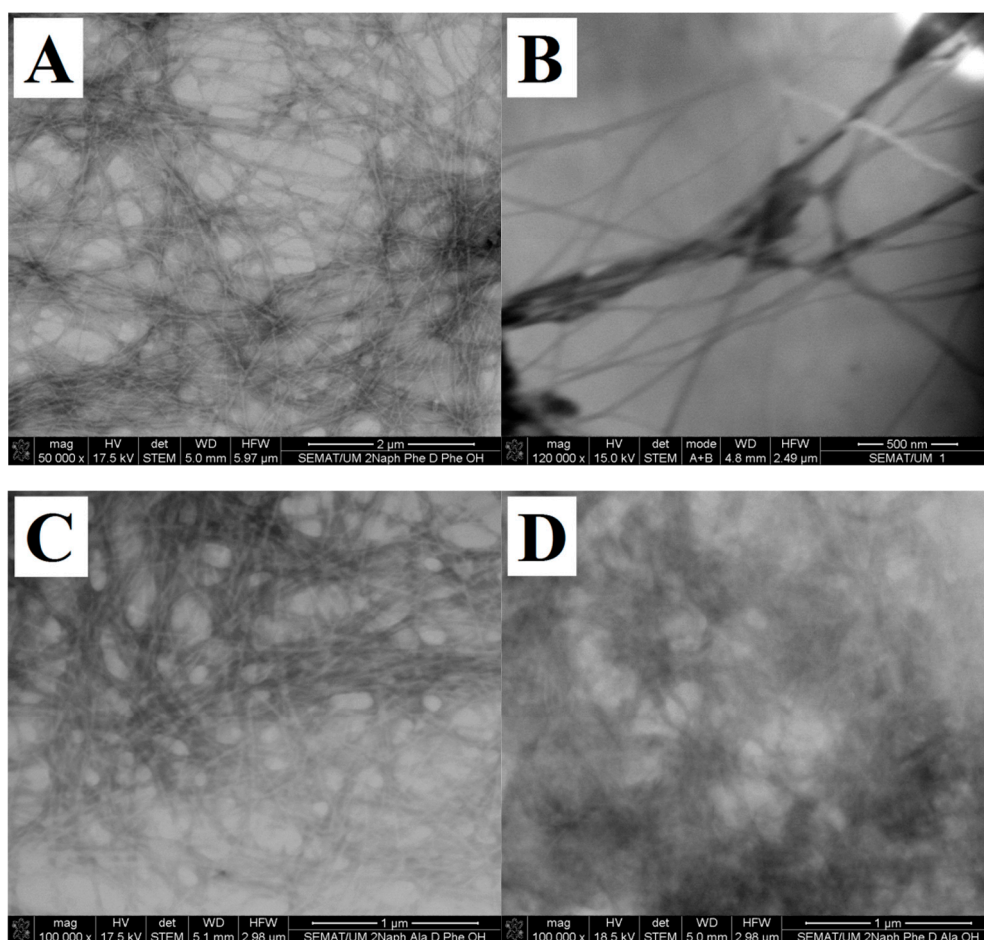

Figure S5. STEM images: A,B) **1a** (gel at 0.5 wt% in phosphate buffer, pH 8), scale A) 2  $\mu$ m, B) 500 nm; C) **1b** [gel at 0.77 wt%] scale 1  $\mu$ m; D) **1c** [gel at 0.6 wt%], scale 1  $\mu$ m.

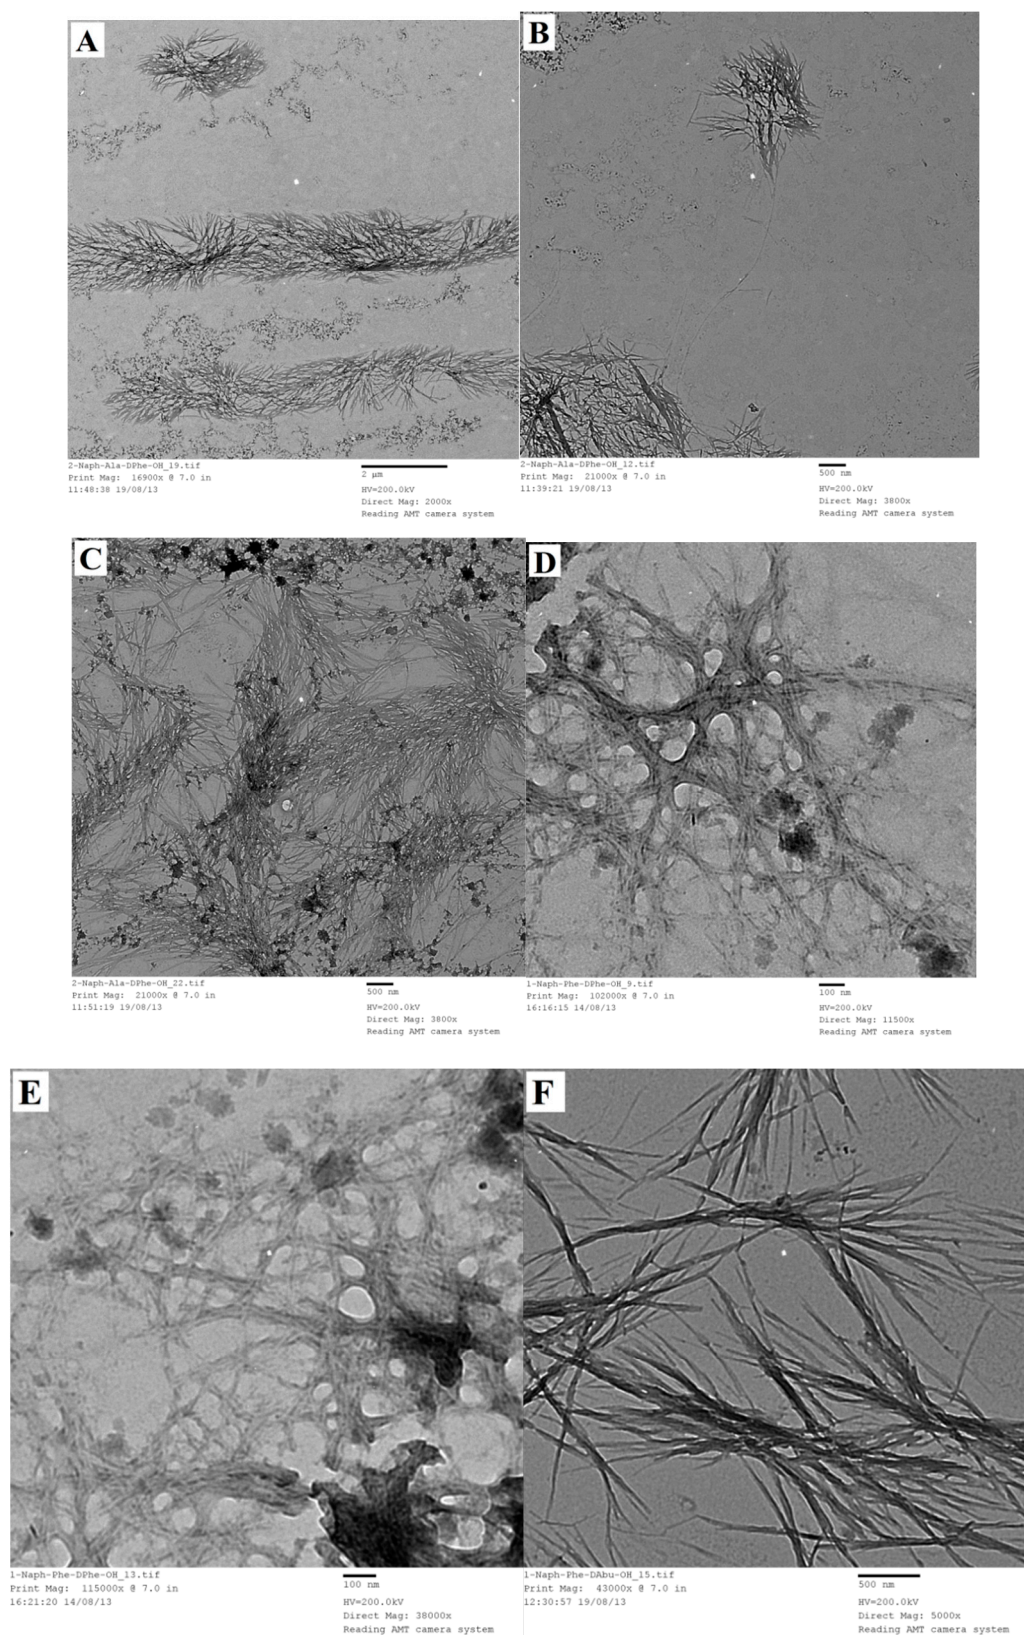

**Figure S6.** TEM images: A,B,C) **1b** (0.65 wt%), scale A) 2 μm; B,C) 500 nm; D,E) **2a** (0.014 wt%), scale 100 nm; F) **2b** (0.040 wt%), scale 500 nm.

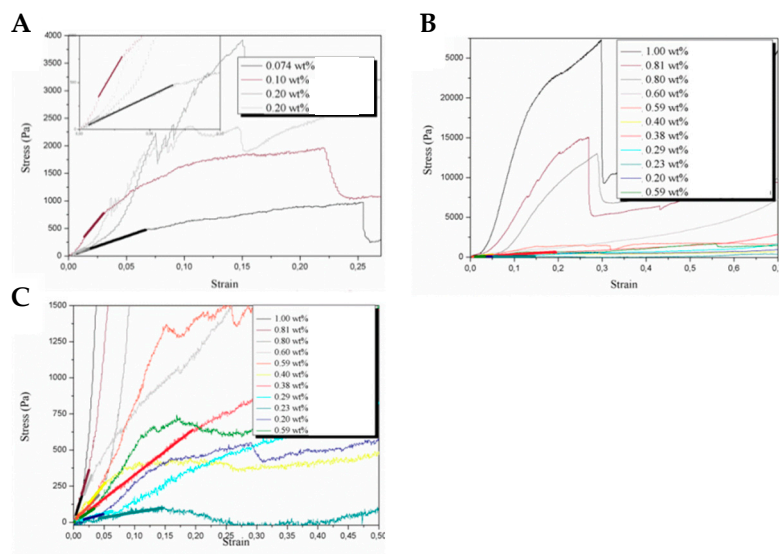

**Figure S7.** Stress-strain response curves for penetration tests for hydrogels at  $25 \mu\text{m s}^{-1}$  plunger speed.: A) gel **2a**; B) gel **2b**; C) Zoom of the linear regime of the stress-strain response curve of compounds **2b**.
